# Supplementary material
Source: PubMed Central journal article supplement (PMC3397856)
Supplement: supp_M112.381996_Supplementary_material.pdf [file supp_M112.381996_Supplementary_material.pdf]

## Supplementary material

Oxidative Stress Induced S-glutathionylation and Proteolytic Degradation of Mitochondrial Thymidine Kinase 2\*

**Ren Sun, Staffan Eriksson and Liya Wang**

From the Department of Anatomy, Physiology and Biochemistry, Swedish University of Agricultural Sciences, The biomedical centre, Box 575, SE-751 23 Uppsala, Sweden

\*Running title: *S-glutathionylation of mitochondrial thymidine kinase 2*

To whom correspondence should be addressed: Dr. Liya Wang, Department of Anatomy, Physiology and Biochemistry, Swedish University of Agricultural Sciences, The Biomedical Centre, Box 575, SE-751 23 Uppsala, Sweden, Tel: +46 18 471 4119; Fax: +46 18 550762 and e-mail: [liya.wang@slu.se](mailto:liya.wang@slu.se)

Figure S1. Amino acid sequence alignment of human TK2 with the *Drosophila melanogaster* deoxynucleoside kinase (Dm-dNK), human deoxycytidine kinase (dCK) and human deoxyguanosine kinase (dGK). The positions of cysteine residues in TK2 are marked with arrows. Secondary structure of Dm-dNK is shown on top of the alignment. The amino acid sequences were aligned using ClustalW2 ([www.ebi.ac.uk](http://www.ebi.ac.uk)) and structural alignment was generated using the ESPript program (<http://esprict.ibcp.fr/ESPript/ESPript/index.php>).
